# Supplementary material
Source: PubMed Central journal article supplement (PMC3680537)
Supplement: cc-12-1578-s01.pdf [file cc-12-1578-s01.pdf]

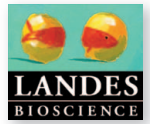

## **Supplemental Material to:**

**Nam Hee Kim, Yong Hoon Cha, Shi Eun Kang, Yoon Mi Lee,  
Inhan Lee, So Young Cha, Joo Kyung Ryu, Jung Min Na,  
Changbum Park, Ho-Geun Yoon, Gyeong-Ju Park, Jong In  
Yook and Hyun Sil Kim**

**p53 regulates nuclear GSK-3 levels through miR-34-  
mediated Axin2 suppression in colorectal cancer cells**

**2013; 12(10)**

**<http://dx.doi.org/10.4161/cc.24739>**

**<http://www.landesbioscience.com/journals/cc/article/24739>**

**miRNA-34a-5p, -b-5p, -c-5p matched site on Axin2-3' UTR**

|                                    |                                                                                                                                                                                                      |                |
|------------------------------------|------------------------------------------------------------------------------------------------------------------------------------------------------------------------------------------------------|----------------|
| hsa-miR-34a-5p<br>3' UTR (240-265) | <pre> 3'  U  UU      G  GUCGAU      UCUGUGACGG  U                                                5'  C  UUGGCUA  UUGA  AGAUGCUGCC  G    UC </pre>                                                    | -26.4 kcal/mol |
| hsa-miR-34a-5p<br>3' UTR (258-282) | <pre> 3'  U  U  U  G  CG      AUUCU  UGACGGU                                       5'  GC  GCC  GU      UGAGA  ACUGCCA    U      U  AUU      G </pre>                                                | -30.0 kcal/mol |
| hsa-miR-34a-5p<br>3' UTR (400-420) | <pre> 3'  U      UC  A  C      U                                    5'  GUUGG  G  UU  UGUGACGG                                    5'  CAGUU  U  GA  AUGCUGCU    UA  G  U </pre>                      | -24.5 kcal/mol |
| hsa-miR-34a-5p<br>3' UTR (824-846) | <pre> 3'  G  U  U  G  CGAUU  UG  UGACGGU                                    5'  G  GGCC  GCUAG  AU  ACUGCCG    A      U      A  C </pre>                                                             | -30.0 kcal/mol |
| hsa-miR-34b-5p<br>3' UTR (240-265) | <pre> 3'  UU      U      CUGUGACGGAU                                 5'  G  AGUCGAU  A  U  GAUGCUGCCUG    UC      U  GAA </pre>                                                                      | -28.1 kcal/mol |
| hsa-miR-34b-5p<br>3' UTR (400-420) | <pre> 3'  GUUA      U  G      UGACGGU                                 5'      GUCGA  UACU  UGACGGU    CAGUU  AUGG  GCUGCUU    U      AUAU </pre>                                                     | -22.0 kcal/mol |
| hsa-miR-34b-5p<br>3' UTR (826-846) | <pre> 3'  G  A  U      ACU      A                                 5'  UU  G  CGAUU  UGUGACGG  U                                 5'  GG  C  GCUAG  CACUGCC  G    C  U      AAU </pre>                 | -24.2 kcal/mol |
| hsa-miR-34c-5p<br>3' UTR (240-264) | <pre> 3'  C  UU      U      A  UGUGACGGA                                 5'  G  AGUCGAU  G  U  AUGCUGCCU    UC      U  GAAG </pre>                                                                   | -25.0 kcal/mol |
| hsa-miR-34c-5p<br>3' UTR (400-420) | <pre> 3'  CGUUA      U  UG      AUGUGACGGA                                 5'      GUCGA  AU  UAUGCUGCUU    CAGUU  AU  U  GGA </pre>                                                                 | -21.1 kcal/mol |
| hsa-miR-34c-5p<br>3' UTR (824-845) | <pre> 3'  G  A  U      GA  U  GUGACGG  A                                 5'  C  UU  G  CGAUU  A  CACUGCC                                 5'  G  GG  C  GCUAG  A  CACUGCC    A  C  U      A  U </pre> | -25.3 kcal/mol |

**miRNA-34a-5p, -b-5p, -c-5p matched site on Axin2-5' UTR**

|                                  |                                                                                                                                                                                    |                |
|----------------------------------|------------------------------------------------------------------------------------------------------------------------------------------------------------------------------------|----------------|
| hsa-miR-34a-5p<br>5' UTR (28-48) | <pre> 3'  UG      C      GU                              5'  UUGGUCGAUU  UG  UGACG                              5'  AGUCGGCUGG  GC  GCUGC    A  CG      G </pre>                   | -22.6 kcal/mol |
| hsa-miR-34a-5p<br>5' UTR (38-63) | <pre> 3'  UG      UC  UGUGA      U                              5'  UUGGUCGAU      C  GG                              5'  AGCCGGCUG      G  CC    CGCUUUGAUAA  G  U  U </pre>      | -23.4 kcal/mol |
| hsa-miR-34b-5p<br>5' UTR (28-51) | <pre> 3'  G      A  U      U                              5'  UUAGUCGAUU  C  G  UGACG  GA                              5'  AGUCGGCUGG  G  C  GCUGC  CU    A  C  G      G  U </pre> | -24.5 kcal/mol |
| hsa-miR-34c-5p<br>5' UTR (1-17)  | <pre> 3'  C  G  UUAGU  GAUUGA  GUG  CGGA                              5'      A  CUGGCU  CGC  GCCU    C      GA </pre>                                                             | -26.0 kcal/mol |
| hsa-miR-34c-5p<br>5' UTR (28-63) | <pre> 3'  CG  UUAGUCGAU      UGAUGUGA      C  GGA                                 5'  AGUCGGCUG      GAGCCG  GCUGCUCU      G  CCU    UUGAUAA  G  U </pre>                          | -26.2 kcal/mol |
